# Supplementary material
Source: PubMed Central journal article supplement (PMC5524597)
Supplement: NIHMS833089-supplement-Suppl.pdf [file NIHMS833089-supplement-Suppl.pdf]

**Supplement to:**  
**Clinical and serological features distinguish patients with incomplete lupus classification**  
**from systemic lupus erythematosus patients and controls** by Aberle, et. al.

**Supplementary Table 1. ANA specificities in SLE and ILE patients by indirect immunofluorescence.**

| <b>Autoantibody</b> | <b>All SLE</b>   | <b>All ILE</b> | <b>OR</b>       |                          |
|---------------------|------------------|----------------|-----------------|--------------------------|
| <b>n (%)</b>        | <b>(n=3,391)</b> | <b>(n=439)</b> | <b>(95% CI)</b> | <b>Adj. P*</b>           |
| dsDNA               | 918 (27.0)       | 40 (9.1)       | 3.7 (2.6-5.3)   | <b>&lt;0.0001</b>        |
| Ro/SSA              | 716 (21.1)       | 53 (12.1)      | 1.9 (1.4-2.7)   | <b>&lt;0.001</b>         |
| La/SSB              | 178 (5.2)        | 9 (2.1)        | 2.6 (1.3-5.9)   | <b>0.005</b>             |
| Sm                  | 219 (6.5)        | 7 (1.6)        | 4.2 (2.0-10.8)  | <b>&lt;0.0001</b>        |
| nRNP                | 684 (20.2)       | 39 (8.9)       | 2.6 (1.8-3.7)   | <b>&lt;0.0001</b>        |
| ENA-P               | 52 (1.5)         | 1 (0.2)        | 6.8 (1.2-274.3) | <b>0.047<sup>+</sup></b> |
| Jo-1                | 1 (0.0)          | 0 (0.0)        | NC              | 1.0                      |

\*Bold values are significant ( $P<0.05$ ). <sup>+</sup>Comparison was made by Fisher's test; all others were performed by Chi-square. NC: not calculable due to 0 value.

**Supplementary Table 2. Autoantibody specificities detected by multiplex assay in African American and European American ILE and SLE patients.**

| Specificity         | African American |                |                    | European American |                |                    | All Other Races |               |                    |
|---------------------|------------------|----------------|--------------------|-------------------|----------------|--------------------|-----------------|---------------|--------------------|
|                     | SLE<br>(n=978)   | ILE<br>(n=103) | Adj.<br><i>P</i> * | SLE<br>(n=1232)   | ILE<br>(n=238) | Adj.<br><i>P</i> * | SLE<br>(n=510)  | ILE<br>(n=93) | Adj.<br><i>P</i> * |
| dsDNA, n (%)        | 350 (35.8)       | 16 (15.5)      | <b>&lt;0.001</b>   | 287 (23.3)        | 25 (10.5)      | <b>&lt;0.0001</b>  | 167 (32.7)      | 7 (7.5)       | <b>&lt;0.0001</b>  |
| Chromatin, n (%)    | 672 (68.7)       | 33 (32.0)      | <b>&lt;0.0001</b>  | 490 (39.8)        | 44 (18.5)      | <b>&lt;0.0001</b>  | 283 (55.5)      | 26 (28.0)     | <b>&lt;0.0001</b>  |
| Ribosomal P, n (%)  | 190 (19.4)       | 4 (3.9)        | <b>&lt;0.001</b>   | 98 (8.0)          | 5 (2.1)        | <b>0.002</b>       | 69 (13.5)       | 2 (2.2)       | <b>0.003</b>       |
| Ro/SSA, n (%)       | 472 (48.3)       | 27 (26.2)      | <b>&lt;0.0001</b>  | 377 (30.6)        | 48 (20.2)      | <b>0.002</b>       | 216 (42.4)      | 33 (35.5)     | 0.262              |
| La/SSB, n (%)       | 140 (14.3)       | 7 (6.8)        | <b>0.049</b>       | 169 (13.7)        | 20 (8.4)       | <b>0.033</b>       | 83 (16.3)       | 12 (12.9)     | 0.505              |
| Sm, n (%)           | 424 (43.4)       | 17 (16.5)      | <b>&lt;0.0001</b>  | 176 (14.3)        | 13 (5.5)       | <b>&lt;0.001</b>   | 130 (25.5)      | 9 (9.7)       | <b>0.001</b>       |
| SmRNP, n (%)        | 621 (63.5)       | 39 (37.9)      | <b>&lt;0.0001</b>  | 255 (20.7)        | 20 (8.4)       | <b>&lt;0.0001</b>  | 191 (37.5)      | 17 (18.3)     | <b>&lt;0.001</b>   |
| RNP, n (%)          | 555 (56.7)       | 38 (36.9)      | <b>&lt;0.001</b>   | 250 (20.3)        | 30 (12.6)      | <b>0.007</b>       | 161 (31.6)      | 19 (20.4)     | <b>0.042</b>       |
| Centromere B, n (%) | 33 (3.4)         | 5 (4.9)        | 0.399 <sup>+</sup> | 58 (4.7)          | 15 (6.3)       | 0.382              | 11 (2.2)        | 5 (5.4%)      | 0.084 <sup>+</sup> |
| Scl-70, n (%)       | 30 (3.1)         | 5 (4.9)        | 0.371 <sup>+</sup> | 32 (2.6)          | 4 (1.7)        | 0.543              | 12 (2.4)        | 2 (2.2%)      | 1.0 <sup>+</sup>   |
| Jo-1, n (%)         | 4 (0.4)          | 2 (1.9)        | 0.105 <sup>+</sup> | 3 (0.2)           | 0 (0.0)        | 1.0 <sup>+</sup>   | 1 (0.2)         | 0 (0.0%)      | 1.0 <sup>+</sup>   |

\*Bold values are significant ( $P < 0.05$ ). \*Comparison was made by Fisher's test; all others were performed by Chi-square.

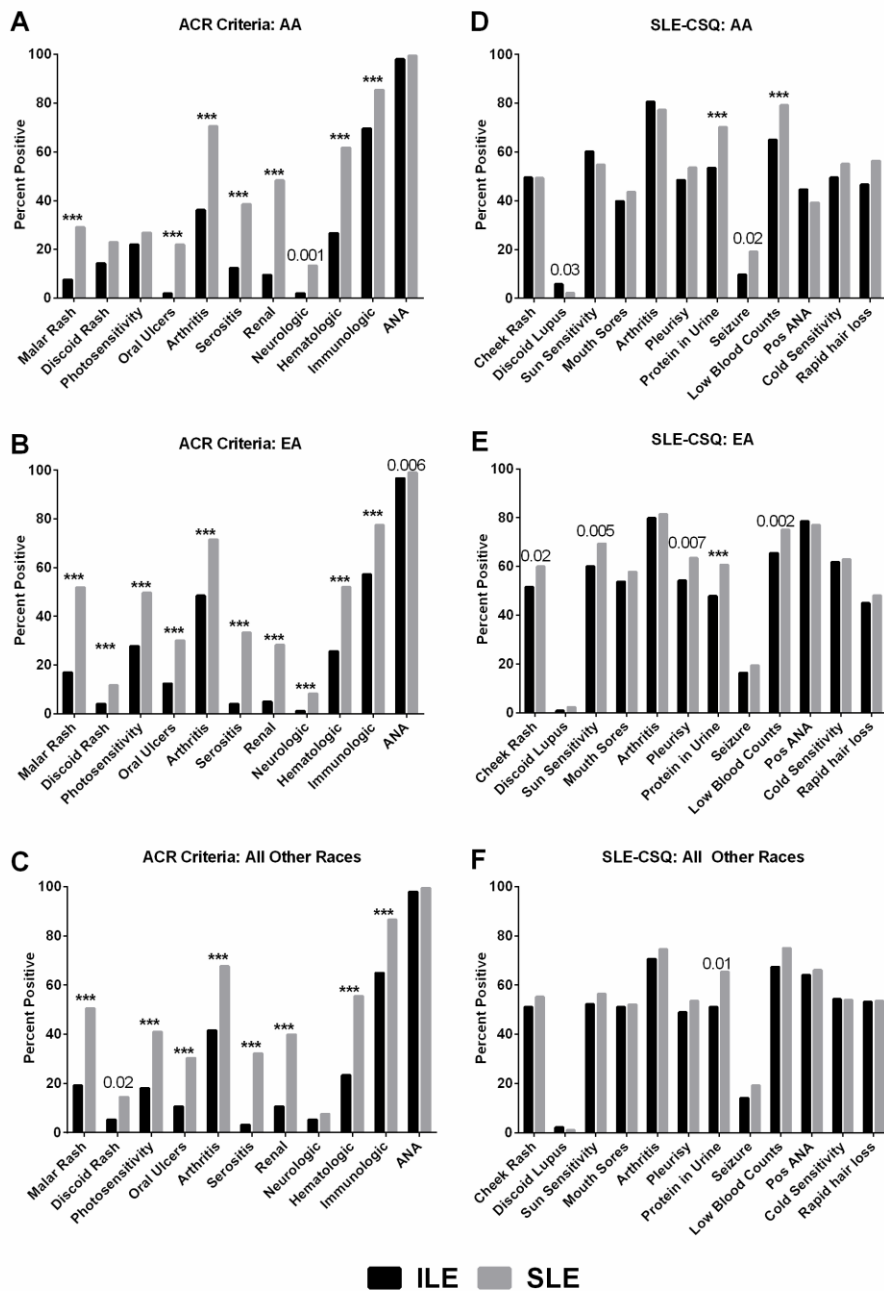

**Supplementary Figure 1. SLE classification criteria and self-reported symptoms in SLE and ILE patients, by race.** (A-C) Medical records were reviewed for the 1997 American College of Rheumatology (ACR) SLE classification criteria. (D-F) Self-reported, SLE-related symptoms were determined by patient responses to the SLE-specific portion of the Connective Tissue Disease Screening Questionnaire (SLE-CSQ). Results are shown in African American (A, D), European American (B, E), and other (C, F) SLE and ILE patients. \*\*\* $P < 0.001$  by Chi-square or Fisher's test. Exact  $P$  values are shown if  $0.05 > P > 0.001$ .  $P$ -values not indicated are not significant ( $P > 0.05$ ).

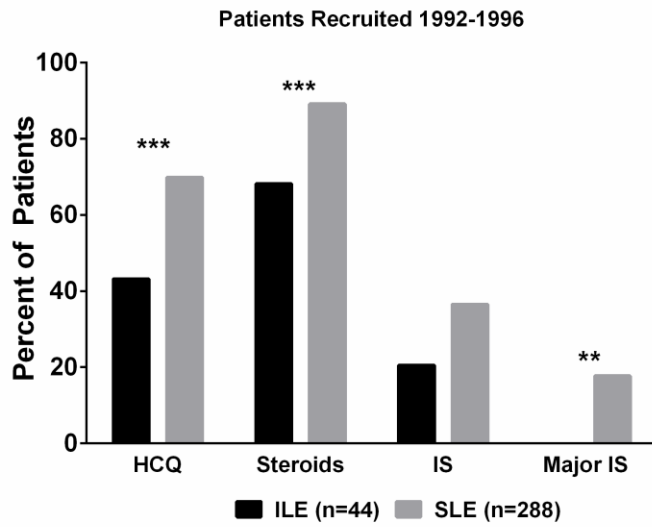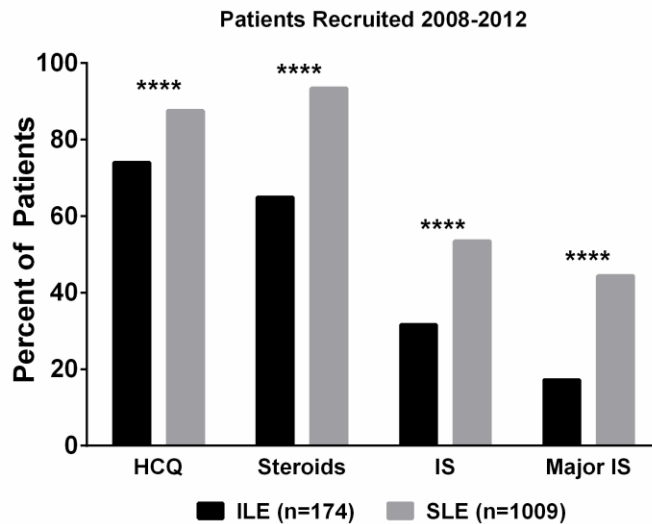

**Supplementary Figure 2. Medication usage in SLE and ILE patients during early and late years of recruitment.** Medical records were reviewed for use of hydroxychloroquine (HCQ), steroids, immunosuppressants (IS; methotrexate, azathioprine, and sulfasalazine), and major IS (mycophenolate mofetil, cyclophosphamide) for ILE and SLE patients recruited from 1992-1996 (top) or from 2008-2012 (bottom). \*\* $P=0.005$ , \*\*\* $P<0.001$ , \*\*\*\* $P<0.0001$  by Chi-square. P-values not indicated are not significant ( $P>0.05$ ).

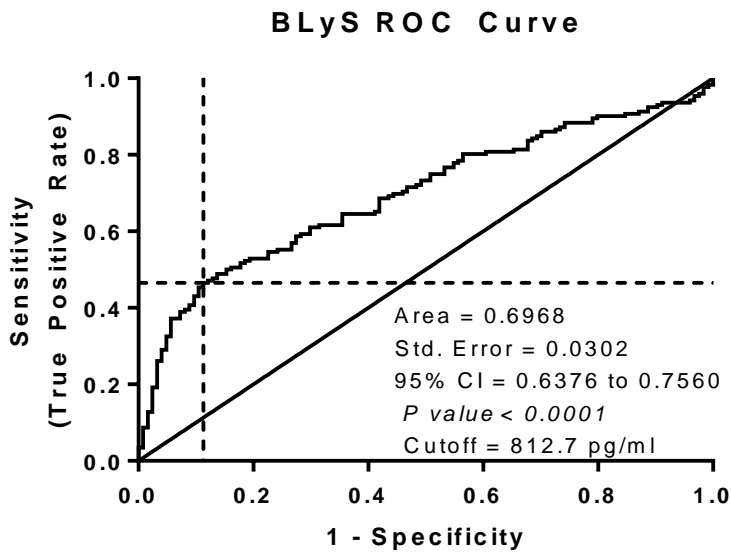

**Supplementary Figure 3. A cutoff value of 812.7 pg/mL identifies BLyS-positive and BLyS-negative samples.** Receiver-operator characteristic (ROC) curves were calculated using quantitative ELISA data for a subset of 72 ILE patients, 100 SLE patients, and 172 controls to determine the BLyS positivity cutoff. The true positive rate (sensitivity) was plotted as a function of the false positive rate (1–specificity) for different positivity thresholds (i.e., different cutoff levels, pg/mL) of a quantitative test. The area under the curve (“Area”) is a measure of how well a quantitative test distinguishes between cases and controls.
